# Supplementary material for: Identification of the Transcription Factor Znc1p, which Regulates the Yeast-to-Hypha Transition in the Dimorphic Yeast Yarrowia lipolytica
Source: PLOS journal article supplement (doi:10.1371/journal.pone.0066790), 2013-06-24
Supplement: S5 (10.1371/journal.pone.0066790.s005) [file journal.pone.0066790.s005]

**TABLE S11. Plasmid used in this study**

| Plasmid     | Genotype                                                                                                                                                                                                                                                   | Source                     |
|-------------|------------------------------------------------------------------------------------------------------------------------------------------------------------------------------------------------------------------------------------------------------------|----------------------------|
| pINA443     | Replicative form with <i>ARS68</i> , <i>URA3</i>                                                                                                                                                                                                           | C. Gaillardin <sup>a</sup> |
| pINA445     | Replicative form with <i>ARS68</i> , <i>LEU2</i>                                                                                                                                                                                                           | C. Gaillardin <sup>a</sup> |
| pJCTGCAN18  | Plasmid recovered from the genomic DNA library, complementing the fil <sup>-</sup> phenotype in CHY33188 strain. Replicative form with <i>ARS68</i> , <i>LEU2</i> .                                                                                        | This study                 |
| pJCTGCAN203 | Plasmid constructed from pJCTGCAN18, <i>ZNC1</i> tagged with <i>GFP</i> in the <i>SpeI</i> site.                                                                                                                                                           | This study                 |
| pJCTGCAN227 | The 2.2-kbp <i>Sall</i> - <i>XbaI</i> fragment from pJCTGCAN18 containing the <i>ZNC1</i> gene cloned into pBlueScript II SK(+).                                                                                                                           | This study                 |
| pJCTGCAN277 | From pJCTGCAN227. Two cysteine residues within the Znc1p zinc finger region were replaced by two arginines (C <sub>22</sub> C <sub>25</sub> /R <sub>22</sub> R <sub>25</sub> ).                                                                            | This study                 |
| pJCTGCAN282 | From pJCTGCAN227. Two leucine residues within the Znc1p leucine zipper region were replaced by two arginines (L <sub>437</sub> L <sub>438</sub> /R <sub>437</sub> R <sub>438</sub> ).                                                                      | This study                 |
| pJCTGCAN294 | The 2.2-kbp <i>Sall</i> - <i>XbaI</i> fragment from pJCTGCAN203 expressing Znc1p-GFP was replaced with the 2.2-kbp <i>Sall</i> - <i>XbaI</i> fragment from pJCTGCAN277. (Znc1p C <sub>22</sub> C <sub>25</sub> /R <sub>22</sub> R <sub>25</sub> -GFP).     | This study                 |
| pJCTGCAN297 | The 2.2-kbp <i>Sall</i> - <i>XbaI</i> fragment from pJCTGCAN203 expressing Znc1p-GFP was replaced with the 2.2-kbp <i>Sall</i> - <i>XbaI</i> fragment from pJCTGCAN282. (Znc1p L <sub>437</sub> L <sub>438</sub> /R <sub>437</sub> R <sub>438</sub> -GFP). | This study                 |

<sup>a</sup>C. Gaillardin. UFR Microbiologie et Génétique Moléculaire, AgroParisTech, Centre de Biotechnologie Agro-Industrielle, Thiverval-Grignon, France.
